# Supplementary material
Source: Springer Nature journal article supplement (https://www.springermedizin.de/resource/supplementary/12936_2014_3213_MOESM3_ESM.pdf/9545334)

**A** Pearson's correlation  
 $r_s = 0.713, p < 0.001$

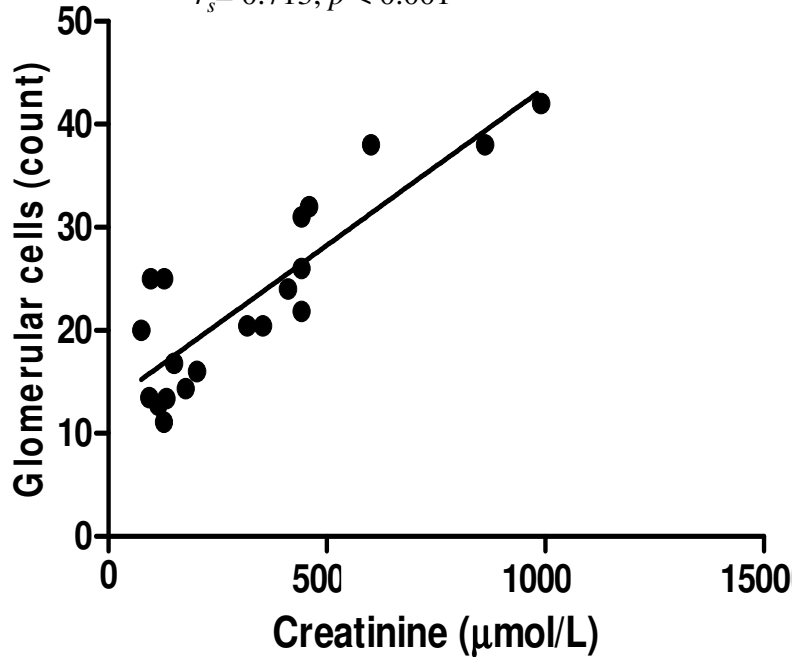

**B** Pearson's correlation  
 $r_s = -0.740, p = 0.049$

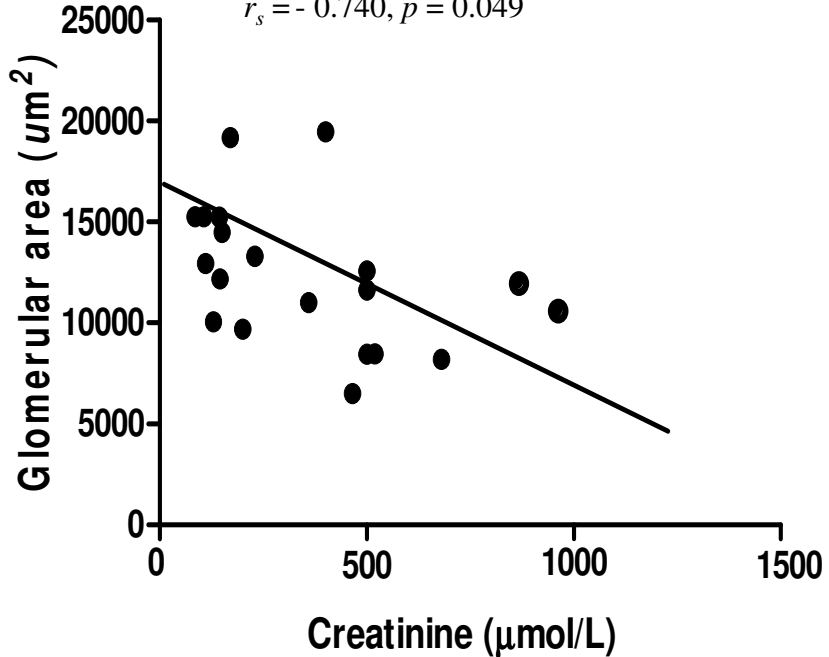

Supplement: MOESM3 [file 9545334]
